# Supplementary material for: Trends in drug poisoning deaths, by sex, in Ireland: a repeated cross-sectional study from 2004 to 2017
Source: HighWire-hosted journal article supplement (doi:10.1136/bmjopen-2020-048000), 2021-09-01
Supplement: bmjopen-2020-048000supp001_data_supplement.pdf [file bmjopen-2020-048000supp001_data_supplement.pdf]

Supplementary Table 1<sup>Y</sup>: Number of individual drug poisoning deaths, with breakdown of age group and drugs involved, by sex, NDRDI 2004 to 2017

|                                                   | 2004 to 2008 n (%) |            |       |            | 2009 to 2013 n (%) |            |       |            | 2014 to 2017 n (%) |            |       |            |
|---------------------------------------------------|--------------------|------------|-------|------------|--------------------|------------|-------|------------|--------------------|------------|-------|------------|
|                                                   | Men                | Women      | Total | % of total | Men                | Women      | Total | % of total | Men                | Women      | Total | % of total |
| <b>All drug poisoning deaths</b>                  | 1145 (68.8)        | 520 (31.2) | 1665  |            | 1315 (71.3)        | 529 (28.7) | 1844  |            | 1022 (68.9)        | 462 (31.1) | 1484  |            |
| <b>Age Groups</b>                                 |                    |            |       |            |                    |            |       |            |                    |            |       |            |
| 13 to 24 years of age                             | 208 (80.9)         | 49 (19.1)  | 257   | 15.4       | 155 (81.2)         | 36 (18.8)  | 191   | 10.4       | 77 (80.2)          | 19 (19.8)  | 96    | 6.5        |
| 25 to 34 years of age                             | 351 (77.8)         | 100 (22.2) | 451   | 27.1       | 403 (79.8)         | 102 (20.2) | 505   | 27.4       | 239 (74.9)         | 80 (25.1)  | 319   | 21.5       |
| 35 to 44 years of age                             | 264 (70.8)         | 109 (29.2) | 373   | 22.4       | 336 (76.9)         | 101 (23.1) | 437   | 23.7       | 335 (72.0)         | 130 (28.0) | 465   | 31.3       |
| 45 to 54 years of age                             | 192 (60.4)         | 126 (39.6) | 318   | 19.1       | 232 (63.7)         | 132 (36.3) | 364   | 19.7       | 209 (70.6)         | 87 (29.4)  | 296   | 19.9       |
| 55 or more years of age                           | 130 (48.9)         | 136 (51.1) | 266   | 16.0       | 189 (54.5)         | 158 (45.5) | 347   | 18.8       | 162 (52.6)         | 146 (47.4) | 308   | 20.8       |
| <b>Polydrugs (≥2 drugs) involved in the death</b> |                    |            |       |            |                    |            |       |            |                    |            |       |            |
| Yes                                               | 511 (66.5)         | 257 (33.5) | 768   | 46.1       | 720 (70.0)         | 309 (30.0) | 1029  | 55.8       | 614 (66.7)         | 306 (33.3) | 920   | 62.0       |
| No                                                | 634 (70.7)         | 263 (29.3) | 897   | 53.9       | 595 (73.0)         | 220 (27.0) | 815   | 44.2       | 408 (72.3)         | 156 (27.7) | 564   | 38.0       |
| <b>CNS depressant drugs involved in the death</b> |                    |            |       |            |                    |            |       |            |                    |            |       |            |
| Yes                                               | 915 (69.1)         | 409 (30.9) | 1324  | 79.5       | 1122 (72.6)        | 424 (27.4) | 1546  | 83.8       | 847 (68.8)         | 384 (31.2) | 1231  | 83.0       |
| No                                                | 230 (67.4)         | 111 (32.6) | 341   | 20.5       | 193 (64.8)         | 105 (35.3) | 298   | 16.2       | 175 (69.2)         | 78 (30.8)  | 253   | 17.0       |
| <b>Breakdown of CNS depressants drugs</b>         |                    |            |       |            |                    |            |       |            |                    |            |       |            |
| <i>Opioids (prescription (63%), heroin (37%))</i> | 627 (75.0)         | 209 (25.0) | 836   | 63.1       | 841 (77.0)         | 251 (23.0) | 1092  | 70.6       | 667 (71.3)         | 268 (28.7) | 935   | 76.0       |
| <i>Alcohol</i>                                    | 451 (65.9)         | 233 (34.1) | 684   | 51.7       | 512 (72.3)         | 196 (27.7) | 708   | 45.8       | 351 (70.6)         | 146 (29.4) | 497   | 40.4       |
| <i>Benzodiazepines</i>                            | 275 (65.5)         | 145 (34.5) | 420   | 31.7       | 490 (72.3)         | 188 (27.7) | 678   | 43.9       | 409 (68.2)         | 191 (31.8) | 600   | 48.7       |
| <i>Z-Drugs</i>                                    | 28 (56.0)          | 22 (44.0)  | 50    | 3.8        | 102 (65.4)         | 54 (34.6)  | 156   | 10.1       | 160 (57.6)         | 118 (42.4) | 278   | 22.6       |
| <i>Pregabalin</i>                                 | 0                  | 0          | 0     |            | 9 (40.9)           | 13 (59.1)  | 22    | 7.4        | 97 (52.2)          | 89 (47.8)  | 186   | 73.5       |
| <b>2 or more CNS depressant drugs involved</b>    |                    |            |       |            |                    |            |       |            |                    |            |       |            |
| Yes                                               | 379 (68.3)         | 176 (31.7) | 555   | 33.3       | 595 (73.5)         | 215 (26.5) | 810   | 43.9       | 517 (67.4)         | 250 (32.6) | 767   | 51.7       |
| No                                                | 766 (69.0)         | 344 (31.0) | 1110  | 66.7       | 720 (69.6)         | 314 (30.4) | 1034  | 56.1       | 505 (70.4)         | 212 (29.6) | 717   | 48.3       |
| <b>Breakdown of ≥2 CNS depressants drugs</b>      |                    |            |       |            |                    |            |       |            |                    |            |       |            |
| <i>Opioids (prescription (63%), heroin (37%))</i> | 365 (74.8)         | 123 (25.2) | 488   | 87.9       | 616 (78.2)         | 172 (21.8) | 788   | 97.3       | 539 (71.1)         | 219 (28.9) | 758   | 98.8       |
| <i>Benzodiazepines</i>                            | 261 (66.6)         | 131 (33.4) | 392   | 70.6       | 473 (73.3)         | 172 (26.7) | 645   | 79.6       | 398 (68.6)         | 182 (31.4) | 580   | 75.6       |
| <i>Alcohol</i>                                    | 193 (64.8)         | 105 (35.2) | 298   | 53.7       | 236 (73.5)         | 85 (26.5)  | 321   | 39.6       | 174 (68.8)         | 79 (31.2)  | 253   | 33.0       |
| <i>Z-Drugs</i>                                    | 26 (60.5)          | 17 (39.5)  | 43    | 7.7        | 89 (63.6)          | 51 (36.4)  | 140   | 17.3       | 147 (56.8)         | 112 (43.2) | 259   | 33.8       |
| <i>Pregabalin</i>                                 | 0                  | 0          | 0     |            | 8 (38.1)           | 13 (61.9)  | 21    | 2.0        | 90 (51.1)          | 86 (48.9)  | 176   | 24.5       |
| <b>Rx Opioids</b>                                 | 346 (66.5)         | 174 (33.5) | 520   | 31.2       | 481 (69.7)         | 209 (30.3) | 690   | 37.4       | 384 (63.7)         | 219 (36.3) | 603   | 40.6       |
| <b>Most commonly</b>                              |                    |            |       |            |                    |            |       |            |                    |            |       |            |
| Methadone                                         | 206 (73.6)         | 74 (26.4)  | 280   | 53.8       | 332 (77.8)         | 95 (22.2)  | 427   | 61.9       | 270 (68.4)         | 125 (31.6) | 395   | 65.5       |
| Codeine                                           | 28 (47.5)          | 31 (52.5)  | 59    | 11.3       | 58 (54.7)          | 48 (45.3)  | 106   | 15.4       | 33 (44.0)          | 42 (56.0)  | 75    | 12.4       |
| Tramadol                                          | 19 (42.2)          | 26 (57.8)  | 45    | 8.7        | 54 (53.5)          | 47 (46.5)  | 101   | 14.6       | 49 (54.4)          | 41 (45.6)  | 90    | 14.9       |
| Fentanyl*                                         | ~                  | 0          | ~     |            | ~                  | ~          | 6     | 0.9        | 15 (60.0)          | 10 (40.0)  | 25    | 4.1        |

|                                                  |            |            |     |      |            |            |     |      |            |            |     |      |
|--------------------------------------------------|------------|------------|-----|------|------------|------------|-----|------|------------|------------|-----|------|
| Polydrug deaths (67.5% involved benzodiazepines) | 243 (65.5) | 128 (34.5) | 371 | 71.3 | 410 (70.7) | 170 (29.3) | 580 | 84.1 | 336 (63.2) | 196 (36.8) | 532 | 88.2 |
| <b>Benzodiazepines</b>                           | 275 (65.5) | 145 (34.5) | 420 | 25.2 | 490 (72.3) | 188 (27.7) | 678 | 36.8 | 409 (68.2) | 191 (31.8) | 600 | 40.4 |
| Most commonly                                    |            |            |     |      |            |            |     |      |            |            |     |      |
| Diazepam                                         | 177 (67.3) | 86 (32.7)  | 263 | 62.6 | 375 (77.0) | 112 (23.0) | 487 | 71.8 | 300 (71.9) | 117 (28.1) | 417 | 69.5 |
| Flurazepam                                       | 57 (60.0)  | 38 (40.0)  | 95  | 22.6 | 112 (64.7) | 61 (35.3)  | 173 | 25.5 | 96 (64.9)  | 52 (35.1)  | 148 | 24.7 |
| Alprazolam                                       | 9 (90.0)   | 1          | 10  | 2.4  | 76 (69.7)  | 33 (30.3)  | 109 | 16.1 | 137 (67.2) | 67 (32.8)  | 204 | 34.0 |
| Polydrug deaths (60% involved Rx Opioids)        | 268 (65.4) | 142 (34.6) | 410 | 97.6 | 485 (73.6) | 174 (26.4) | 659 | 97.2 | 405 (68.2) | 189 (31.8) | 594 | 99.0 |
| <b>Antidepressants</b>                           | 129 (51.0) | 124 (49.0) | 253 | 15.2 | 190 (49.4) | 195 (50.6) | 385 | 20.9 | 181 (51.0) | 174 (49.0) | 355 | 23.9 |
| Most commonly                                    |            |            |     |      |            |            |     |      |            |            |     |      |
| Citalopram                                       | 30 (44.1)  | 38 (55.9)  | 68  | 26.9 | 61 (55.0)  | 50 (45.0)  | 111 | 28.8 | 38 (51.4)  | 36 (48.6)  | 74  | 20.8 |
| Amitriptyline                                    | 31 (55.4)  | 25 (44.6)  | 56  | 22.1 | 28 (37.3)  | 47 (62.7)  | 75  | 19.5 | 43 (52.4)  | 39 (47.6)  | 82  | 23.1 |
| Venlafaxine                                      | 17 (63.0)  | 10 (37.0)  | 27  | 10.7 | 22 (44.9)  | 27 (55.1)  | 49  | 12.7 | 16 (40.0)  | 24 (60.0)  | 40  | 11.3 |
| Polydrug deaths (61% involved benzodiazepines)   | 106 (50.2) | 105 (49.8) | 211 | 83.4 | 174 (51.8) | 162 (48.2) | 336 | 87.3 | 164 (51.4) | 155 (48.6) | 319 | 89.9 |
| <b>Alcohol</b>                                   | 451 (65.9) | 233 (34.1) | 684 | 41.1 | 512 (72.3) | 196 (27.7) | 708 | 38.4 | 351 (70.6) | 146 (29.4) | 497 | 33.5 |
| Polydrug deaths (30% involved benzodiazepines)   | 225 (64.7) | 123 (35.3) | 348 | 50.9 | 265 (71.8) | 104 (28.2) | 369 | 52.1 | 195 (69.6) | 85 (30.4)  | 280 | 56.3 |
| <b>Cocaine</b>                                   | 195 (83.0) | 40 (17.0)  | 235 | 14.1 | 131 (84.0) | 25 (16.0)  | 156 | 8.5  | 142 (77.6) | 41 (22.4)  | 183 | 12.3 |
| Polydrug deaths (54% involved benzodiazepines)   | 126 (82.4) | 27 (17.6)  | 153 | 65.1 | 119 (83.8) | 23 (16.2)  | 142 | 91.0 | 125 (76.7) | 38 (23.3)  | 163 | 89.1 |
| <b>Heroin</b>                                    | 281 (88.9) | 35 (11.1)  | 316 | 19.0 | 360 (89.6) | 42 (10.4)  | 402 | 21.8 | 283 (85.2) | 49 (14.8)  | 332 | 22.4 |
| Polydrug deaths (65% involved benzodiazepines)   | 178 (87.3) | 26 (12.7)  | 204 | 64.6 | 241 (87.3) | 35 (12.7)  | 276 | 68.7 | 232 (85.6) | 39 (14.4)  | 271 | 81.6 |

~ = value less than 5

\* Although fentanyl is not one of the main prescription opioid drugs involved in drug poisoning deaths in Ireland, data displayed for information purposes

† This is a multi-response analysis taking into account up to six drugs implicated in any one death, therefore individual rows will not equal totals.
